# Supplementary material
Source: PubMed Central journal article supplement (PMC3174768)
Supplement: NIHMS320297-supplement-Supplementary_figures.pdf [file NIHMS320297-supplement-Supplementary_figures.pdf]

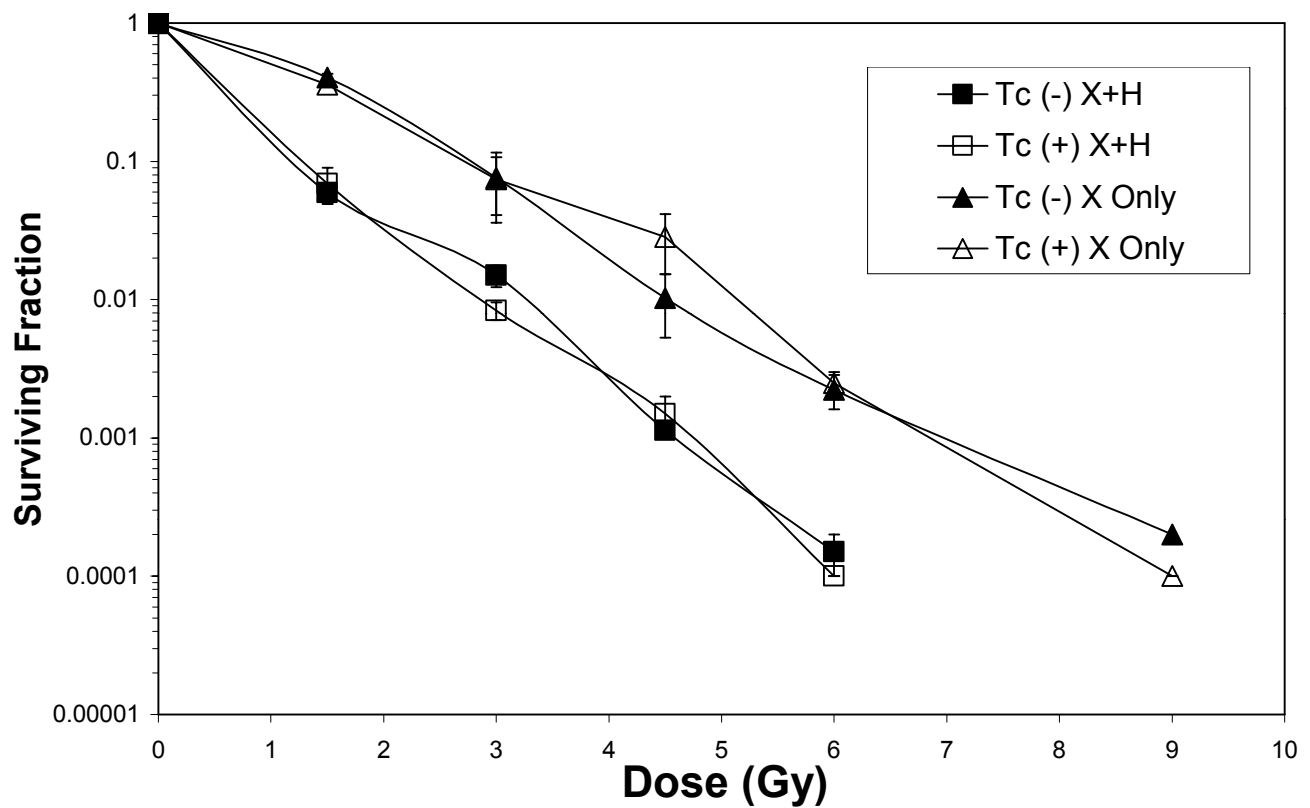

Supplementary Fig. 1. Overexpression of Rad50 does not reduce heat radiosensitization. HeLa-hRad50 cells were incubated at 37°C for 48 hours in the presence (Tc +) or absence (Tc -) of tetracycline. Cells were then irradiated or irradiated and then heated for 10 min at 45.5°C prior to plating for clonogenic survival. Error bars represent the SEM for the data from at least two or three experiments.

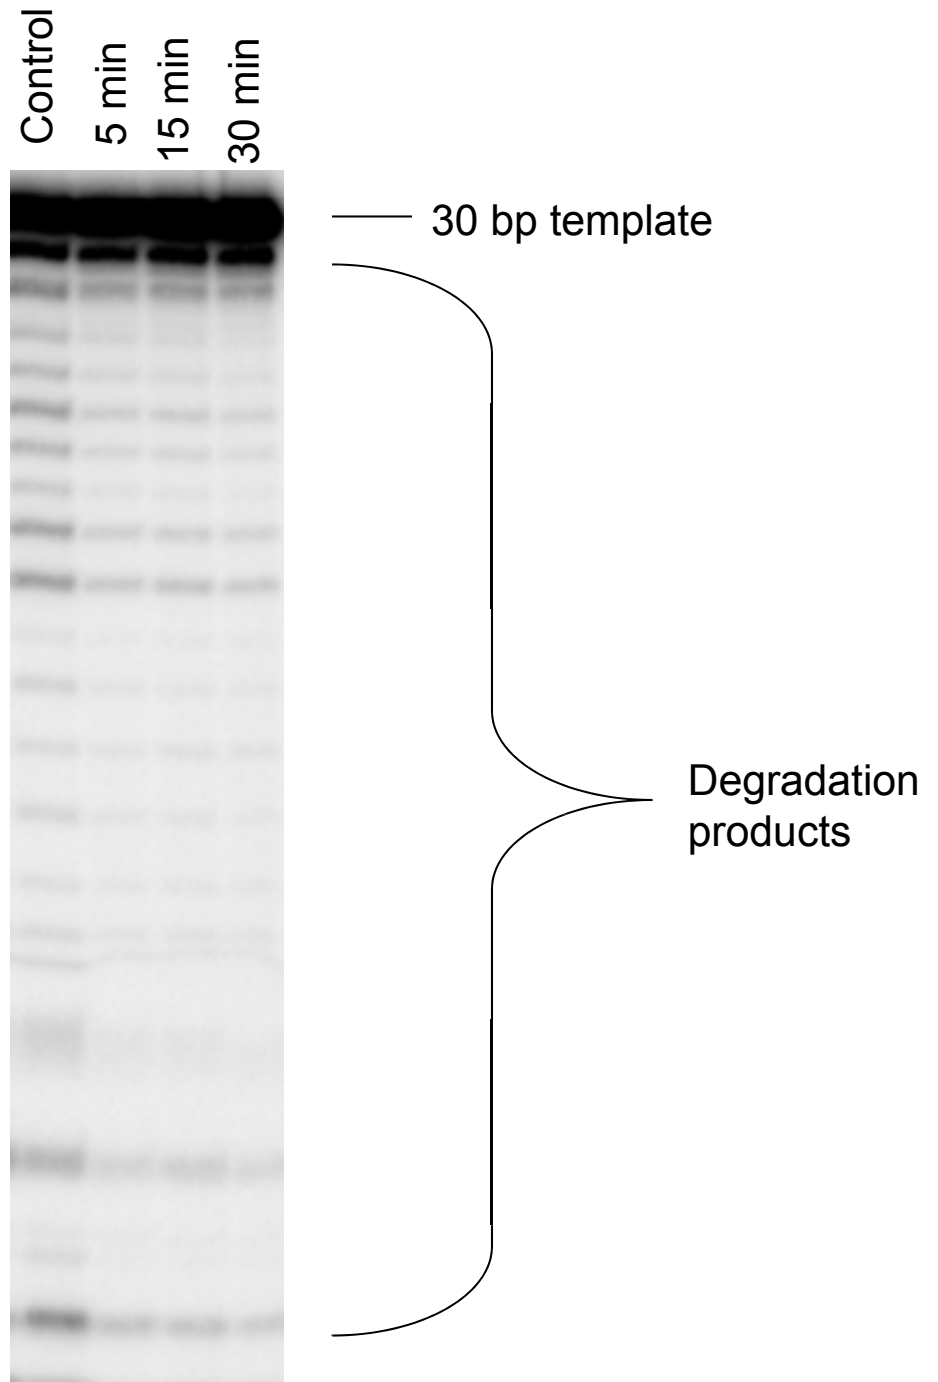

Supplementary Fig. 2. Loss of Mre11 exonuclease activity after 45.5°C heat treatment. Three  $\mu\text{g}$  of Mre11 was heated at 45.5°C for indicated times. After heat treatment, 2  $\mu\text{g}$  of Mre11 was incubated with 200 pmol of DNA substrate and then run on a sequencing gel.

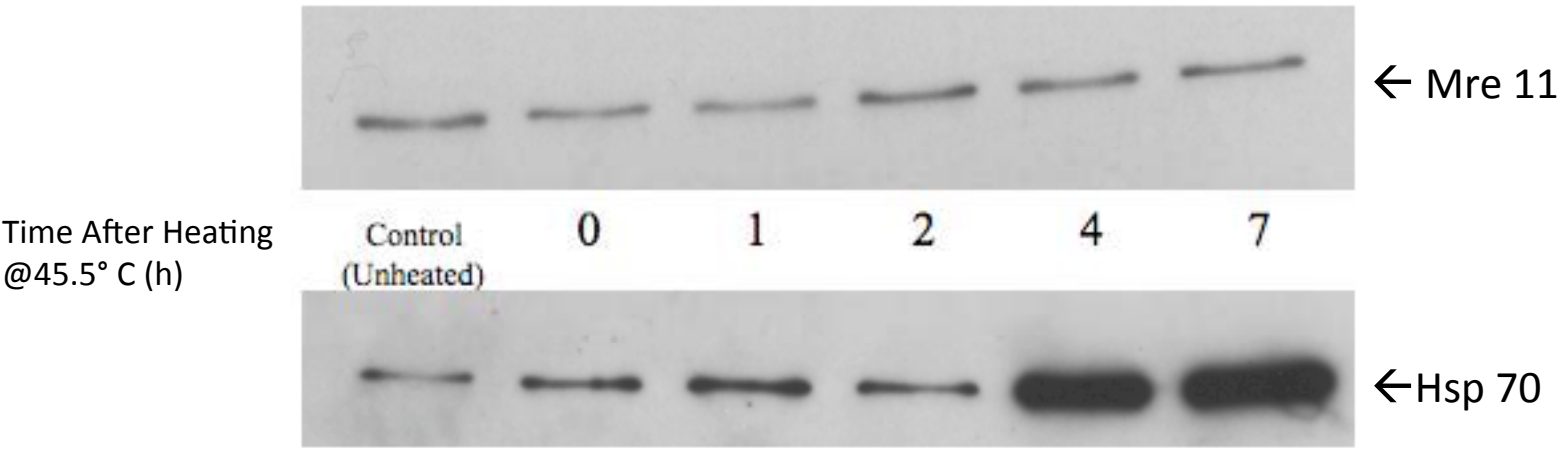

Supplementary Fig. 3. Heated-induced association between Hsp70 and Mre11. HeLa cells were heated for 15 min at 45.5°C, incubated at 37°C for various times, and then Mre11 was immunoprecipitated from whole cell lysates prior to SDS-PAGE. Representative immunoblots probed for Mre11 and Hsp70 are shown.
